# Supplementary material for: PRPF19 facilitates colorectal cancer liver metastasis through activation of the Src -YAP1 pathway via K63-linked ubiquitination of MYL9
Source: Research Square preprint supplement (doi:10.21203/rs.3.rs-2202605/v1), 2022-11-30
Supplement: Supplementary file 1 [file 3ab65cbe5d9d707a2a8aa225.docx]

**Supplementary Figure 1**

**(A)** The expression level of PRPF19 in pan-cancers according to the data from CPTAC datasets. **(B)** The mRNA expression of PRPF19 in normal (N) and CRC tissues (T) was evaluated in both colorectal cancer and [rectal cancer](javascript:;) according to the data from TCGA. **(C)** Immunoblots of PRPF19 expression in normal colon epithelial cell line FHC and seven CRC cell lines.

**Supplementary Figure 2**

**(A-D)** Kaplan–Meier survival analysis of the association between PRPF19 expression and the DFS or OS rate of CRC patients in stageⅠ-Ⅱ (A-B) and stage Ⅲ-Ⅳ (C-D), respectively.

**Supplementary Figure 3**

**(A-B)** Kaplan–Meier curves showing the DFS and OS rate based on the expression of MYL9 in CRC tissues from GEPIA database (http://gepia.cancer-pku.cn/).

**Supplementary Figure 4**

**(A)** HCT116 cells were treated with MG132 for 5 h before being collected. Cell lysates were immunoprecipitated with anti-IgG, anti-MYL9, or anti-PRPF19 followed by immunoblots. **(B-C)** The mRNA (B) and protein (C) expression level of MYL9 in the indicated stable cell lines. ***, *p*<0.001 based on Student’s *t*-test.
